# Supplementary material for: Investigation of the structure and ionic conductivity of intercalated kaolinites with potassium acetate in hydrous and anhydrous phases
Source: Royal Society of Chemistry journal article supplement (doi:10.1039/c4dt04018j), 2015-01-01
Supplement: c4dt04018j1.pdf [file c4dt04018j1.pdf]

## ESI

### **Investigation of structure and ionic conductivity for intercalated kaolinites with potassium acetate in hydrous and anhydrous phases**

Xiao-Pei Li,<sup>a</sup> Hao Yang,<sup>a</sup> Zheng-Fang Tian,<sup>\*a,b</sup> Jian-Lan Liu,<sup>a</sup> Xiao-Ming Ren<sup>\*a,c,d</sup>

<sup>a</sup> State Key Laboratory of Materials-Oriented Chemical Engineering and College of Science, Nanjing Tech University, Nanjing 210009, P. R. China

<sup>b</sup> School of Chemical Engineer, Huanggang Normal University, Huanggang 438000, P. R. China

<sup>c</sup> College of Materials Science and Engineering, Nanjing Tech University, Nanjing 210009, P. R. China

<sup>d</sup> Coordination Chemistry Institute & State Key Laboratory, Nanjing University, Nanjing 210093, P. R. China

**# Xiao-Pei Li and Hao Yang contribute equally**

Tel.: +86 25 58139476

Fax: +86 25 58139481

Email: [xmren@njtech.edu.cn](mailto:xmren@njtech.edu.cn)

样品: KAc  
大小: 8.6360 mg  
方法: custom

DSC-TGA

文件: D:\Data\tianzhenfang\Ren\KAc.001

运行日期: 26-十一月-2014 11:25

仪器: SDT Q600 V20.9 Build 20

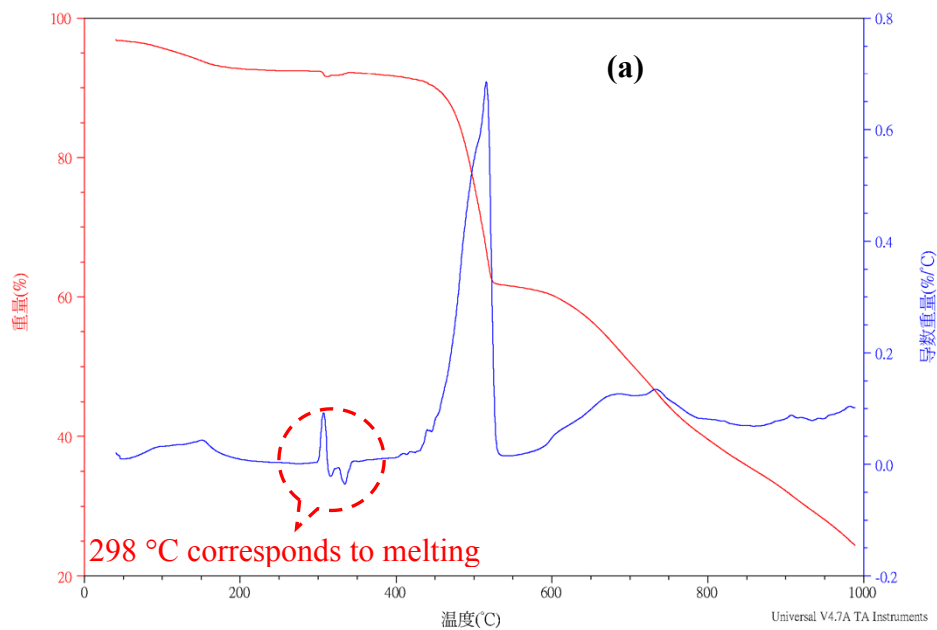

样品: KAc-after-iso  
大小: 16.6830 mg  
方法: Ramp

DSC-TGA

文件: D:\Data\tianzhenfang\Ren\KAc-after-iso.001

运行日期: 27-十一月-2014 17:55

仪器: SDT Q600 V20.9 Build 20

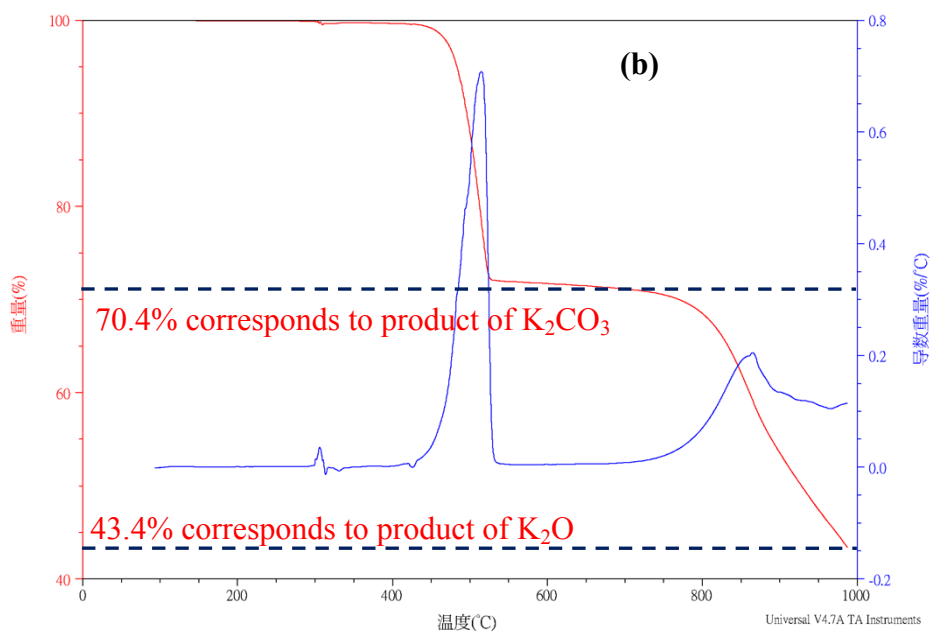

Figure S1 Thermogravimetric Curves of (a) hydrous  $KAc \cdot 0.5H_2O$  and (b) anhydrous KAc.

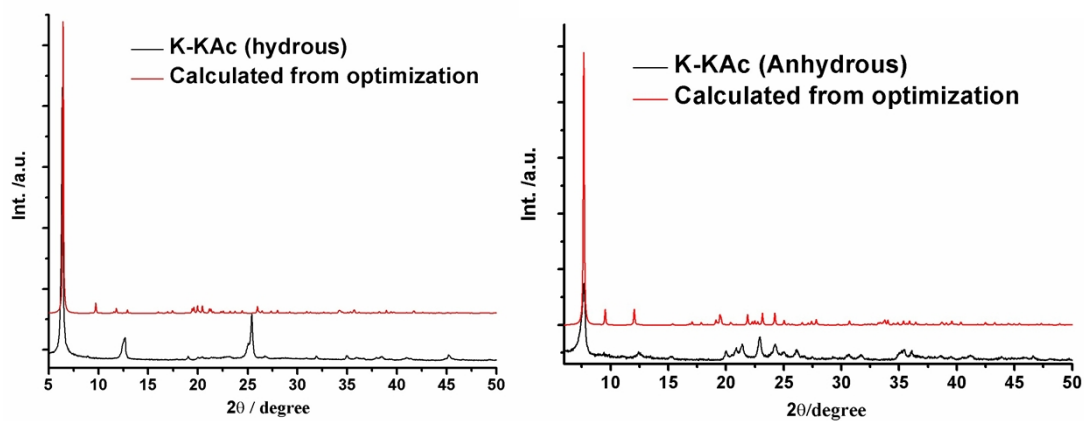

**Figure S2** Experimental and calculated PXRD patterns of (a) hydrous and (b) anhydrous models, respectively.

**Table S1** The calculated resistances of boundary ( $R_1$ ) and block ( $R_2$ ) derived from the fit at selected temperatures, respectively.

| T / K | $R_1$ / ohm | $R_2$ / ohm |
|-------|-------------|-------------|
| 423   | 7.961E5     | 8.001E5     |
| 418   | 1.637E6     | 2.506E6     |
| 413   | 4.027E6     | 5.167E6     |
| 408   | 8.727E6     | 9.254E6     |
| 403   | 1.32E7      | 1.684E7     |
| 398   | 6.452E7     | 6.581E7     |
